# Supplementary material for: Type One Protein Phosphatase 1 and Its Regulatory Protein Inhibitor 2 Negatively Regulate ABA Signaling
Source: PLoS Genet. 2016 Mar 4;12(3):e1005835. doi: 10.1371/journal.pgen.1005835 (PMC4778861; doi:10.1371/journal.pgen.1005835)
Supplement: S1 Dataset — (XLSX) [file pgen.1005835.s009.xlsx]

## Sheet: Sheet1
Gene ID	Col-0-ctrl	Col-0-ABA	ati-2-ctrl	ati-2-ABA
AT5G54165	0	265.995	0	318.521
AT5G45630	2.26086	574.893	0.714706	797.417	Protein of unknown function, DUF584
AT4G30470	106.26	1736.48	124.359	2706.32	NAD(P)-binding Rossmann-fold superfamily protein
AT4G21440	0	135.143	0	178.936	MYB-like 102	Encodes a MYB transcription factor involved in wounding and osmotic stress response. Member of the R2R3 factor gene family.
AT1G02205	39.5651	644.61	62.1795	819.691	Fatty acid hydroxylase superfamily	Expression of the CER1 gene associated with production of stem epicuticular wax and pollen fertility. Biochemical studies showed that cer1 mutants are blocked in the conversion of stem wax C30 aldehydes to C29 alkanes, and they also lack the secondary alcohols and ketones. These suggested the CER1 protein is an aldehyde decarbonylase, but the exact molecular function of this protein remains to be…
AT5G59320	24.8695	652.118	36.45	1260.72	lipid transfer protein 3	Predicted to encode a PR (pathogenesis-related) protein. Belongs to the lipid transfer protein (PR-14) family with the following members: At2g38540/LTP1, At2g38530/LTP2, At5g59320/LTP3, At5g59310/LTP4, At3g51600/LTP5, At3g08770/LTP6, At2g15050/LTP7, At2g18370/LTP8, At2g15325/LTP9, At5g01870/LTP10, At4g33355/LTP11, At3g51590/LTP12, At5g44265/LTP13, At5g62065/LTP14, At4g08530/LTP15.
AT5G01300	1.13043	110.474	0.714706	135.873	PEBP (phosphatidylethanolamine-binding protein) family protein
AT1G24580	14.6956	344.292	10.0059	772.915	RING/U-box superfamily protein
AT2G46680	28.2608	2123.67	23.5853	2680.33	homeobox 7	encodes a putative transcription factor that contains a homeodomain closely linked to a leucine zipper motif. Transcript is detected in all tissues examined. Is transcriptionally regulated in an ABA-dependent manner and may act in a signal transduction pathway which mediates a drought response.
AT5G52310	775.476	34385.3	460.986	56048.6	low-temperature-responsive protein 78 (LTI78) / desiccation-responsive protein 29A (RD29A)	cold regulated gene, the 5' region of cor78 has cis-acting regulatory elements that can impart cold-regulated gene expression
AT2G40610	331.216	10.7256	365.93	12.6221	expansin A8	member of Alpha-Expansin Gene Family. Naming convention from the Expansin Working Group (Kende et al, 2004. Plant Mol Bio). Involved in the formation of nematode-induced syncytia in roots of Arabidopsis thaliana.
AT5G05220	0	405.428	0	702.38
AT3G15670	0	412.936	0	461.819	Late embryogenesis abundant protein (LEA) family protein
AT1G79270	92.6953	1480.14	82.1912	2117.54	evolutionarily conserved C-terminal region 8
AT4G40010	35.0434	624.231	25.7294	1206.52	SNF1-related protein kinase 2.7	encodes a member of SNF1-related protein kinases (SnRK2) whose activity is activated by ionic (salt) and non-ionic (mannitol) osmotic stress.
AT2G15970	2472.25	38735.6	2148.41	49956.6	cold regulated 413 plasma membrane 1	encodes an alpha form of a protein similar to the cold acclimation protein WCOR413 in wheat. Expression is induced by short-term cold-treatment, water deprivation, and abscisic acid treatment.
AT3G57020	23.739	767.954	25.7294	838.995	Calcium-dependent phosphotriesterase superfamily protein
AT1G62570	160.521	11967.6	113.638	17262.5	flavin-monooxygenase glucosinolate S-oxygenase 4	belongs to the flavin-monooxygenase (FMO) family, encodes a glucosinolate S-oxygenase that catalyzes the conversion of methylthioalkyl glucosinolates to methylsulfinylalkyl glucosinolates
AT1G29395	48.6085	1000.7	30.0177	1208.75	COLD REGULATED 314 INNER MEMBRANE 1	Integral membrane protein in the inner envelope of chloroplasts. Provide freezing tolerance. Expression is induced by short-term cold-treatment, water deprivation, and abscisic acid treatment.
AT4G33467	0	984.612	0	1893.31
AT1G56600	18.0869	2797.24	18.5824	3847.5	galactinol synthase 2
AT1G21790	37.3042	905.242	52.1736	1139.7	TRAM, LAG1 and CLN8 (TLC) lipid-sensing domain containing protein
AT1G73390	57.652	1809.41	75.0442	3073.1	Endosomal targeting BRO1-like domain-containing protein
AT5G52300	2.26086	6491.14	0.714706	8283.78	CAP160 protein	encodes a protein that is induced in expression in response to water deprivation such as cold, high-salt, and dessication. The response appears to be via abscisic acid. The promoter region contains two ABA-responsive elements (ABREs) that are required for the dehydration-responsive expression of rd29B as cis-acting elements. Protein is a member of a gene family with other members found plants, an…
AT3G03341	1.13043	4270.94	0.714706	5876.68
AT4G33905	2.26086	770.099	1.42941	923.637	Peroxisomal membrane 22 kDa (Mpv17/PMP22) family protein
AT5G41040	228.347	4231.26	328.05	4916.66	HXXXD-type acyl-transferase family protein	Encodes a feruloyl-CoA transferase required for suberin synthesis. Has feruloyl-CoA-dependent feruloyl transferase activity towards substrates with a primary alcohol.
AT3G48240	3.39129	151.231	3.57353	252.441	Octicosapeptide/Phox/Bem1p family protein
AT1G02310	3.39129	115.837	1.42941	210.863	Glycosyl hydrolase superfamily protein
AT2G36770	0	109.401	0	69.7925	UDP-Glycosyltransferase superfamily protein
AT2G19810	96.0866	2441.15	58.6059	2491	CCCH-type zinc finger family protein
AT1G01520	0	61.136	0.714706	123.251	Homeodomain-like superfamily protein
AT5G15500	0	237.036	0.714706	441.029	Ankyrin repeat family protein
AT1G20440	2052.86	26905.2	1272.89	37222.4	cold-regulated 47	Belongs to the dehydrin protein family, which contains highly conserved stretches of 7-17 residues that are repetitively scattered in their sequences, the K-, S-, Y- and lysine rich segments. Cold regulated gene, amino acid sequence homology with Group II LEA (late embryogenesis abundant) proteins. Also responds to osmotic stress, ABA, dehydration and inhibits e.coli growth while overexpressed. C…
AT5G06760	4.52172	6110.39	2.85883	8744.11	Late Embryogenesis Abundant 4-5	Encodes LEA4-5, a member of the Late Embryogenesis Abundant (LEA) proteins which typically accumulate in response to low water availability conditions imposed during development or by the environment. Most of thediverse set of LEA proteins can be grouped according to properties such as high hydrophilicity and high content of glycine or other small amino acids in what has been termed hydrophilins.…
AT3G14810	27.1303	725.052	47.8853	1071.39	mechanosensitive channel of small conductance-like 5
AT3G17520	7.91302	1178.75	3.57353	1158.26	Late embryogenesis abundant protein (LEA) family protein
AT3G61890	11.3043	663.916	6.43236	1271.12	homeobox 12	Encodes a homeodomain leucine zipper class I (HD-Zip I) protein. Loss of function mutant has abnormally shaped leaves and stems.
AT4G25433	0	132.998	1.42941	175.966	peptidoglycan-binding LysM domain-containing protein
AT3G02480	7.91302	2466.89	0.714706	3159.23	Late embryogenesis abundant protein (LEA) family protein
AT4G33550	15.826	745.431	28.5883	806.327	Bifunctional inhibitor/lipid-transfer protein/seed storage 2S albumin superfamily protein
AT2G21820	2.26086	146.941	1.42941	230.909
AT1G17940	77.9997	1031.8	62.1795	1646.81	Endosomal targeting BRO1-like domain-containing protein
AT2G46270	61.0433	1038.24	36.45	1373.58	G-box binding factor 3	encodes a bZIP G-box binding protein whose expression is induced by ABA. It has been shown to bind to Adh that contains the G-box and is induced by cold and water deprivation. GBF3 has been shown to be expressed mostly in the root and dark-grown leaves. GBF3 can act as homodimers and as heterodimers with GFB1, GBF2 and GBF4. In addition, GBF3í»s DNA binding activity is enhanced by GIP1, GPRI1 and…
AT5G66400	0	2337.11	1.42941	2170.25	Dehydrin family protein	Belongs to the dehydrin protein family, which contains highly conserved stretches of 7-17 residues that are repetitively scattered in their sequences, the K-, S-, Y- and lysine rich segments. ABA- and drought-induced glycine-rice dehydrin protein. The ABA-induced expression of RAB18 was reduced following ACC application, indicating that ethylene inhibits the ABA signaling pathway. RAB18 is also e…
AT1G16850	73.478	1580.96	73.6148	2177.68
AT1G58270	487.216	7182.95	453.839	10595.1	TRAF-like family protein	ZW9 mRNA, complete cds
AT5G53710	3.39129	100.821	0	224.97
AT2G22122	319.912	8.5805	358.068	23.0167
AT2G04350	204.608	3142.61	238.712	3341.13	AMP-dependent synthetase and ligase family protein
AT2G29090	4.52172	145.868	5.00294	264.321	cytochrome P450, family 707, subfamily A, polypeptide 2	Encodes a protein with ABA 8'-hydroxylase activity, involved in ABA catabolism. Member of the CYP707A gene family. This gene predominantly accumulates in dry seeds and is up-regulated immediately following imbibition. CYP707A2 appears to play a major role in the rapid decrease in ABA levels during early seed imbibition.
AT1G52690	5.65215	4995.99	3.57353	5310.17	Late embryogenesis abundant protein (LEA) family protein
AT5G15970	750.606	9527.57	411.671	11723.7	stress-responsive protein (KIN2) / stress-induced protein (KIN2) / cold-responsive protein (COR6.6) / cold-regulated protein (COR6.6)	Encodes a gene that can be induced by cold and abscisic acid and may be involved in cold acclimation and salt tolerance.
AT5G43840	0	51.483	0	112.856	heat shock transcription factor A6A	member of Heat Stress Transcription Factor (Hsf) family
AT4G11460	124.347	1.07256	184.394	3.71237	cysteine-rich RLK (RECEPTOR-like protein kinase) 30	Encodes a cysteine-rich receptor-like protein kinase.
AT1G22370	18.0869	277.794	13.5794	325.204	UDP-glucosyl transferase 85A5
AT2G42540	15.826	1449.03	4.28824	2759.03	cold-regulated 15a	A cold-regulated gene whose product is targeted to the chloroplast. Cor15am protects stromal proteins from aggregation under various stress conditions. Constitutive expression increases freezing tolerance in protoplasts in vitro and chloroplasts in vivo. NMR and x-ray diffraction studies suggest that COR15a alters the intrinsic curvature of the inner membrane of chloroplast envelope. Late Embryog…
AT5G62490	0	229.528	0	292.535	HVA22 homologue B	Part of the AtHVA22 family. Protein expression is ABA- and stress-inducible.
AT2G19900	2.26086	481.58	4.28824	614.026	NADP-malic enzyme 1	The malic enzyme (EC 1.1.1.40) encoded by AtNADP-ME1 is expressed in response to developmental and cell-specific signals. The enzyme is active in vitro and appears to function as a homohexamer or homooctamer. It is believed to be a cytosolic protein.
AT2G35300	4.52172	248.834	0	286.595	Late embryogenesis abundant protein, group 1 protein
AT3G50970	143.565	5492.59	84.3353	11576.7	dehydrin family protein	Belongs to the dehydrin protein family, which contains highly conserved stretches of 7-17 residues that are repetitively scattered in their sequences, the K-, S-, Y- and lysine rich segments. LTI29 and LTI30 double overexpressors confer freeze tolerance. Located in membranes. mRNA upregulated by water deprivation and abscisic acid.
AT4G34790	65.565	0	63.6089	2.22742	SAUR-like auxin-responsive protein family
AT2G17680	0	87.9501	0.714706	123.251	Arabidopsis protein of unknown function (DUF241)
AT4G09600	0	188.771	0	187.846	GAST1 protein homolog 3	One of GASA gene family which is related to a GA-stimulated transcript (GAST) from tomato.
AT4G23450	16.9565	358.236	5.71765	453.652	RING/U-box superfamily protein
AT3G22600	434.085	10309.5	691.836	11509.1	Bifunctional inhibitor/lipid-transfer protein/seed storage 2S albumin superfamily protein
AT3G15534	0	72.9342	0	108.401
AT3G56275	10.1739	1521.97	4.28824	1788.62		pseudogene of unknown protein
AT5G10230	5.65215	175.9	5.00294	249.471	annexin 7	Encodes a calcium-binding protein annexin (AnnAt7).
AT5G13900	7.91302	1088.65	32.8765	1454.51	Bifunctional inhibitor/lipid-transfer protein/seed storage 2S albumin superfamily protein
AT1G20450	1189.21	16950.8	689.692	25541.1	Dehydrin family protein	Encodes a gene induced by low temperature and dehydration. Inhibits e.coli growth while overexpressed. Belongs to the dehydrin protein family, which contains highly conserved stretches of 7-17 residues that are repetitively scattered in their sequences, the K-, S-, Y- and lysine rich segments. LTI29 and LTI30 double overexpressors confer cold tolerance. Localized to membranes and cytoplasm.
AT4G02280	23.739	612.433	30.0177	518.247	sucrose synthase 3	Encodes a protein with sucrose synthase activity (SUS3). It appears to be important for sucrose metabolism in developing seeds, especially during the late maturation phase, about 18 days after flowering.
AT4G31830	0	69.7165	0	83.1571
AT2G31980	21.4782	493.378	10.0059	657.832	PHYTOCYSTATIN 2
AT5G17460	104	16940	136.509	25801
AT5G03210	19.2173	3603.81	3.57353	4980.51
AT1G69480	6.78258	312.116	0.714706	410.588	EXS (ERD1/XPR1/SYG1) family protein
AT4G12580	5.65215	130.853	6.43236	249.471
AT5G09520	13.5652	743.285	26.4441	981.55	hydroxyproline-rich glycoprotein family protein
AT3G22830	3.39129	1651.75	0.714706	2483.58	heat shock transcription factor A6B	member of Heat Stress Transcription Factor (Hsf) family
AT2G36780	3.39129	181.263	3.57353	141.813	UDP-Glycosyltransferase superfamily protein
AT2G23910	7.91302	314.261	12.8647	374.207	NAD(P)-binding Rossmann-fold superfamily protein
AT1G64110	4.52172	129.78	2.14412	193.043	P-loop containing nucleoside triphosphate hydrolases superfamily protein
AT1G29640	15.826	634.957	9.29118	1107.03	Protein of unknown function, DUF584
AT3G51750	2.26086	97.6031	1.42941	158.147
AT4G05100	11.3043	611.36	3.57353	939.229	myb domain protein 74	Member of the R2R3 factor gene family.
AT5G62480	58.7824	851.614	66.4677	1061	glutathione S-transferase tau 9	Encodes glutathione transferase belonging to the tau class of GSTs. Naming convention according to Wagner et al. (2002).
AT2G41190	67.8258	5165.46	52.8883	5783.13	Transmembrane amino acid transporter family protein
AT1G07985	27.1303	850.542	12.15	1238.45	Expressed protein

## Sheet: Sheet2
id	Col-0-ctrl	Col-0-ABA	topp1-ctrl	topp1-ABA
AT5G45630	2.26086	574.893	4.51946	924.543	Protein of unknown function, DUF584
AT4G30470	106.26	1736.48	163.454	3120.25	NAD(P)-binding Rossmann-fold superfamily protein
AT4G21440	0	135.143	0	237.526	MYB-like 102	Encodes a MYB transcription factor involved in wounding and osmotic stress response. Member of the R2R3 factor gene family.
AT1G02205	39.5651	644.61	42.9348	898.359	Fatty acid hydroxylase superfamily	Expression of the CER1 gene associated with production of stem epicuticular wax and pollen fertility. Biochemical studies showed that cer1 mutants are blocked in the conversion of stem wax C30 aldehydes to C29 alkanes, and they also lack the secondary alcohols and ketones. These suggested the CER1 protein is an aldehyde decarbonylase, but the exact molecular function of this protein remains to be…
AT5G59320	24.8695	652.118	44.4413	1210.7	lipid transfer protein 3	Predicted to encode a PR (pathogenesis-related) protein. Belongs to the lipid transfer protein (PR-14) family with the following members: At2g38540/LTP1, At2g38530/LTP2, At5g59320/LTP3, At5g59310/LTP4, At3g51600/LTP5, At3g08770/LTP6, At2g15050/LTP7, At2g18370/LTP8, At2g15325/LTP9, At5g01870/LTP10, At4g33355/LTP11, At3g51590/LTP12, At5g44265/LTP13, At5g62065/LTP14, At4g08530/LTP15.
AT5G01300	1.13043	110.474	3.01297	148.376	PEBP (phosphatidylethanolamine-binding protein) family protein
AT1G24580	14.6956	344.292	10.5454	621.557	RING/U-box superfamily protein
AT2G46680	28.2608	2123.67	28.6232	3140.83	homeobox 7	encodes a putative transcription factor that contains a homeodomain closely linked to a leucine zipper motif. Transcript is detected in all tissues examined. Is transcriptionally regulated in an ABA-dependent manner and may act in a signal transduction pathway which mediates a drought response.
AT5G52310	775.476	34385.3	511.452	64557.2	low-temperature-responsive protein 78 (LTI78) / desiccation-responsive protein 29A (RD29A)	cold regulated gene, the 5' region of cor78 has cis-acting regulatory elements that can impart cold-regulated gene expression
AT5G05220	0	405.428	0	637.766
AT1G79270	92.6953	1480.14	81.3502	2324.76	evolutionarily conserved C-terminal region 8
AT4G40010	35.0434	624.231	61.7659	1352.21	SNF1-related protein kinase 2.7	encodes a member of SNF1-related protein kinases (SnRK2) whose activity is activated by ionic (salt) and non-ionic (mannitol) osmotic stress.
AT2G15970	2472.25	38735.6	3620.84	48382.3	cold regulated 413 plasma membrane 1	encodes an alpha form of a protein similar to the cold acclimation protein WCOR413 in wheat. Expression is induced by short-term cold-treatment, water deprivation, and abscisic acid treatment.
AT1G62570	160.521	11967.6	147.636	18106.8	flavin-monooxygenase glucosinolate S-oxygenase 4	belongs to the flavin-monooxygenase (FMO) family, encodes a glucosinolate S-oxygenase that catalyzes the conversion of methylthioalkyl glucosinolates to methylsulfinylalkyl glucosinolates
AT1G29395	48.6085	1000.7	54.9867	1521.16	COLD REGULATED 314 INNER MEMBRANE 1	Integral membrane protein in the inner envelope of chloroplasts. Provide freezing tolerance. Expression is induced by short-term cold-treatment, water deprivation, and abscisic acid treatment.
AT4G33467	0	984.612	1.50649	1976.27
AT1G56600	18.0869	2797.24	19.5843	4072.23	galactinol synthase 2
AT1G21790	37.3042	905.242	44.4413	1139	TRAM, LAG1 and CLN8 (TLC) lipid-sensing domain containing protein
AT2G42530	9.04345	225.238	2.25973	249.994	cold regulated 15b
AT1G73390	57.652	1809.41	73.0645	3036.09	Endosomal targeting BRO1-like domain-containing protein
AT5G52300	2.26086	6491.14	1.50649	11914.3	CAP160 protein	encodes a protein that is induced in expression in response to water deprivation such as cold, high-salt, and dessication. The response appears to be via abscisic acid. The promoter region contains two ABA-responsive elements (ABREs) that are required for the dehydration-responsive expression of rd29B as cis-acting elements. Protein is a member of a gene family with other members found plants, an…
AT3G03341	1.13043	4270.94	3.01297	6265.45
AT3G48240	3.39129	151.231	2.25973	280.542	Octicosapeptide/Phox/Bem1p family protein
AT1G02310	3.39129	115.837	3.76621	277.425	Glycosyl hydrolase superfamily protein
AT1G01520	0	61.136	0.753243	119.075	Homeodomain-like superfamily protein
AT2G36750	2.26086	93.3129	0	87.2799	UDP-glucosyl transferase 73C1
AT5G15500	0	237.036	0	505.6	Ankyrin repeat family protein
AT1G20440	2052.86	26905.2	1959.18	43810.7	cold-regulated 47	Belongs to the dehydrin protein family, which contains highly conserved stretches of 7-17 residues that are repetitively scattered in their sequences, the K-, S-, Y- and lysine rich segments. Cold regulated gene, amino acid sequence homology with Group II LEA (late embryogenesis abundant) proteins. Also responds to osmotic stress, ABA, dehydration and inhibits e.coli growth while overexpressed. C…
AT5G06760	4.52172	6110.39	6.77918	9524.1	Late Embryogenesis Abundant 4-5	Encodes LEA4-5, a member of the Late Embryogenesis Abundant (LEA) proteins which typically accumulate in response to low water availability conditions imposed during development or by the environment. Most of thediverse set of LEA proteins can be grouped according to properties such as high hydrophilicity and high content of glycine or other small amino acids in what has been termed hydrophilins.…
AT3G14810	27.1303	725.052	33.1427	1004.97	mechanosensitive channel of small conductance-like 5
AT3G61890	11.3043	663.916	20.3376	1279.27	homeobox 12	Encodes a homeodomain leucine zipper class I (HD-Zip I) protein. Loss of function mutant has abnormally shaped leaves and stems.
AT4G25433	0	132.998	3.01297	173.313	peptidoglycan-binding LysM domain-containing protein
AT3G02480	7.91302	2466.89	12.0519	4171.35	Late embryogenesis abundant protein (LEA) family protein
AT2G21820	2.26086	146.941	1.50649	181.417
AT1G17940	77.9997	1031.8	54.2335	1641.48	Endosomal targeting BRO1-like domain-containing protein
AT2G46270	61.0433	1038.24	45.9478	1321.67	G-box binding factor 3	encodes a bZIP G-box binding protein whose expression is induced by ABA. It has been shown to bind to Adh that contains the G-box and is induced by cold and water deprivation. GBF3 has been shown to be expressed mostly in the root and dark-grown leaves. GBF3 can act as homodimers and as heterodimers with GFB1, GBF2 and GBF4. In addition, GBF3í»s DNA binding activity is enhanced by GIP1, GPRI1 and…
AT1G16850	73.478	1580.96	65.5321	2446.95
AT1G58270	487.216	7182.95	437.634	9842.67	TRAF-like family protein	ZW9 mRNA, complete cds
AT5G53710	3.39129	100.821	3.76621	215.082
AT2G22122	319.912	8.5805	598.828	19.3263
AT1G12420	24.8695	567.385	23.3505	644.624	ACT domain repeat 8
AT2G29090	4.52172	145.868	4.51946	263.086	cytochrome P450, family 707, subfamily A, polypeptide 2	Encodes a protein with ABA 8'-hydroxylase activity, involved in ABA catabolism. Member of the CYP707A gene family. This gene predominantly accumulates in dry seeds and is up-regulated immediately following imbibition. CYP707A2 appears to play a major role in the rapid decrease in ABA levels during early seed imbibition.
AT5G15970	750.606	9527.57	732.905	13138.1	stress-responsive protein (KIN2) / stress-induced protein (KIN2) / cold-responsive protein (COR6.6) / cold-regulated protein (COR6.6)	Encodes a gene that can be induced by cold and abscisic acid and may be involved in cold acclimation and salt tolerance.
AT5G43840	0	51.483	0	134.66	heat shock transcription factor A6A	member of Heat Stress Transcription Factor (Hsf) family
AT4G11460	124.347	1.07256	86.6229	1.87028	cysteine-rich RLK (RECEPTOR-like protein kinase) 30	Encodes a cysteine-rich receptor-like protein kinase.
AT2G34610	10.1739	710.036	3.01297	711.331
AT2G42540	15.826	1449.03	12.0519	3241.82	cold-regulated 15a	A cold-regulated gene whose product is targeted to the chloroplast. Cor15am protects stromal proteins from aggregation under various stress conditions. Constitutive expression increases freezing tolerance in protoplasts in vitro and chloroplasts in vivo. NMR and x-ray diffraction studies suggest that COR15a alters the intrinsic curvature of the inner membrane of chloroplast envelope. Late Embryog…
AT5G62490	0	229.528	0	326.676	HVA22 homologue B	Part of the AtHVA22 family. Protein expression is ABA- and stress-inducible.
AT2G19900	2.26086	481.58	3.01297	729.41	NADP-malic enzyme 1	The malic enzyme (EC 1.1.1.40) encoded by AtNADP-ME1 is expressed in response to developmental and cell-specific signals. The enzyme is active in vitro and appears to function as a homohexamer or homooctamer. It is believed to be a cytosolic protein.
AT3G50970	143.565	5492.59	117.506	13777.7	dehydrin family protein	Belongs to the dehydrin protein family, which contains highly conserved stretches of 7-17 residues that are repetitively scattered in their sequences, the K-, S-, Y- and lysine rich segments. LTI29 and LTI30 double overexpressors confer freeze tolerance. Located in membranes. mRNA upregulated by water deprivation and abscisic acid.
AT4G34790	65.565	0	124.285	1.24686	SAUR-like auxin-responsive protein family
AT2G17680	0	87.9501	0	117.204	Arabidopsis protein of unknown function (DUF241)
AT4G23450	16.9565	358.236	18.0778	535.524	RING/U-box superfamily protein
AT3G15534	0	72.9342	0	111.594
AT4G29930	4.52172	122.272	0.753243	132.79	basic helix-loop-helix (bHLH) DNA-binding superfamily protein
AT1G75960	119.826	3.21769	93.4021	1.87028	AMP-dependent synthetase and ligase family protein
AT5G10230	5.65215	175.9	9.03891	274.932	annexin 7	Encodes a calcium-binding protein annexin (AnnAt7).
AT5G13900	7.91302	1088.65	24.857	1542.36	Bifunctional inhibitor/lipid-transfer protein/seed storage 2S albumin superfamily protein
AT1G20450	1189.21	16950.8	757.009	29827.9	Dehydrin family protein	Encodes a gene induced by low temperature and dehydration. Inhibits e.coli growth while overexpressed. Belongs to the dehydrin protein family, which contains highly conserved stretches of 7-17 residues that are repetitively scattered in their sequences, the K-, S-, Y- and lysine rich segments. LTI29 and LTI30 double overexpressors confer cold tolerance. Localized to membranes and cytoplasm.
AT2G31980	21.4782	493.378	14.3116	678.913	PHYTOCYSTATIN 2
AT5G17460	104	16940	180.025	24303.1
AT5G03210	19.2173	3603.81	9.79216	5347.14
AT1G69480	6.78258	312.116	1.50649	428.295	EXS (ERD1/XPR1/SYG1) family protein
AT4G12580	5.65215	130.853	4.51946	384.031
AT5G09520	13.5652	743.285	21.0908	1024.91	hydroxyproline-rich glycoprotein family protein
AT3G30210	0	114.764	0	127.803	myb domain protein 121	Encodes a putative transcription factor, member of the R2R3 factor gene family (MYB121).
AT3G22830	3.39129	1651.75	2.25973	2215.66	heat shock transcription factor A6B	member of Heat Stress Transcription Factor (Hsf) family
AT1G64110	4.52172	129.78	2.25973	271.191	P-loop containing nucleoside triphosphate hydrolases superfamily protein
AT1G29640	15.826	634.957	17.3246	1004.97	Protein of unknown function, DUF584
AT5G15190	24.8695	1343.92	43.6881	1456.33
AT3G51750	2.26086	97.6031	1.50649	193.263
AT3G29575	223.825	7516.51	214.674	8558.41	ABI five binding protein 3
AT5G51990	2.26086	224.165	0	263.086	C-repeat-binding factor 4	encodes a member of the DREB subfamily A-1 of ERF/AP2 transcription factor family (CBF4). The protein contains one AP2 domain. There are six members in this subfamily, including CBF1, CBF2, and CBF3. This gene is involved in response to drought stress and abscisic acid treatment, but not to low temperature.
AT4G05100	11.3043	611.36	6.77918	791.753	myb domain protein 74	Member of the R2R3 factor gene family.
AT5G62480	58.7824	851.614	68.5451	1164.56	glutathione S-transferase tau 9	Encodes glutathione transferase belonging to the tau class of GSTs. Naming convention according to Wagner et al. (2002).
AT1G07985	27.1303	850.542	31.6362	1162.07	Expressed protein
